# Supplementary figures and images for: Arbuscular mycorrhizal fungi inoculation exerts weak effects on species- and community-level growth traits for invading or native plants under nitrogen deposition
Source: Frontiers journal article supplement (doi:10.3389/fevo.2023.1152213), 2023-07-17

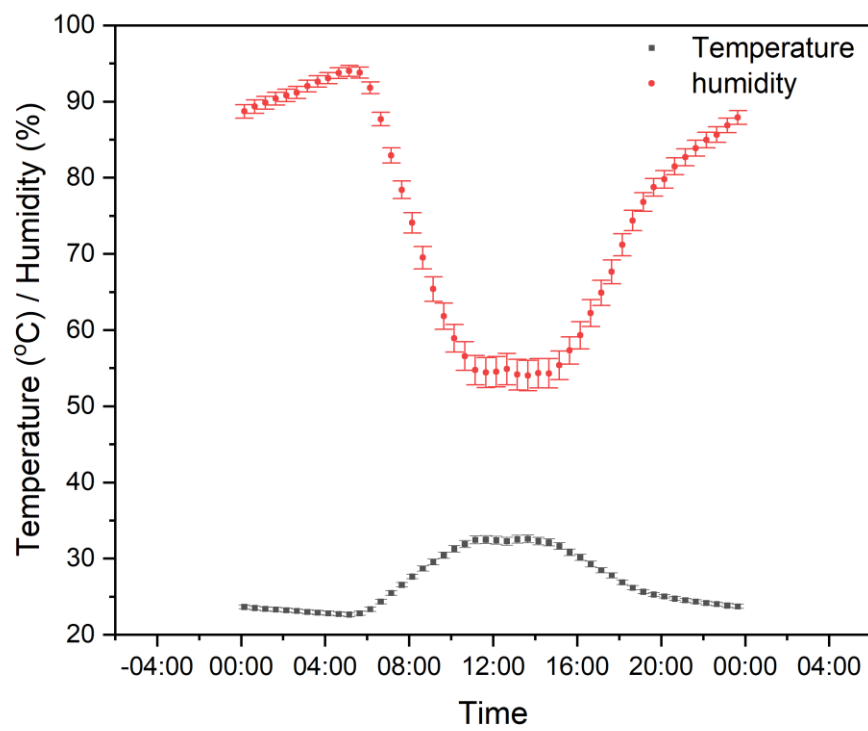

**Figure S2** Typical diurnal pattern of temperature and humidity in the experimental period.

Supplement: Image_2.pdf [file Image_2.pdf]
